# Supplementary material for: Effect of Freeze Drying and Simulated Gastrointestinal Digestion on Phenolic Metabolites and Antioxidant Property of the Natal Plum (Carissa macrocarpa)
Source: MDPI journal article supplement (doi:10.3390/foods10061420), 2021-06-18
Supplement: s1 [file s1]

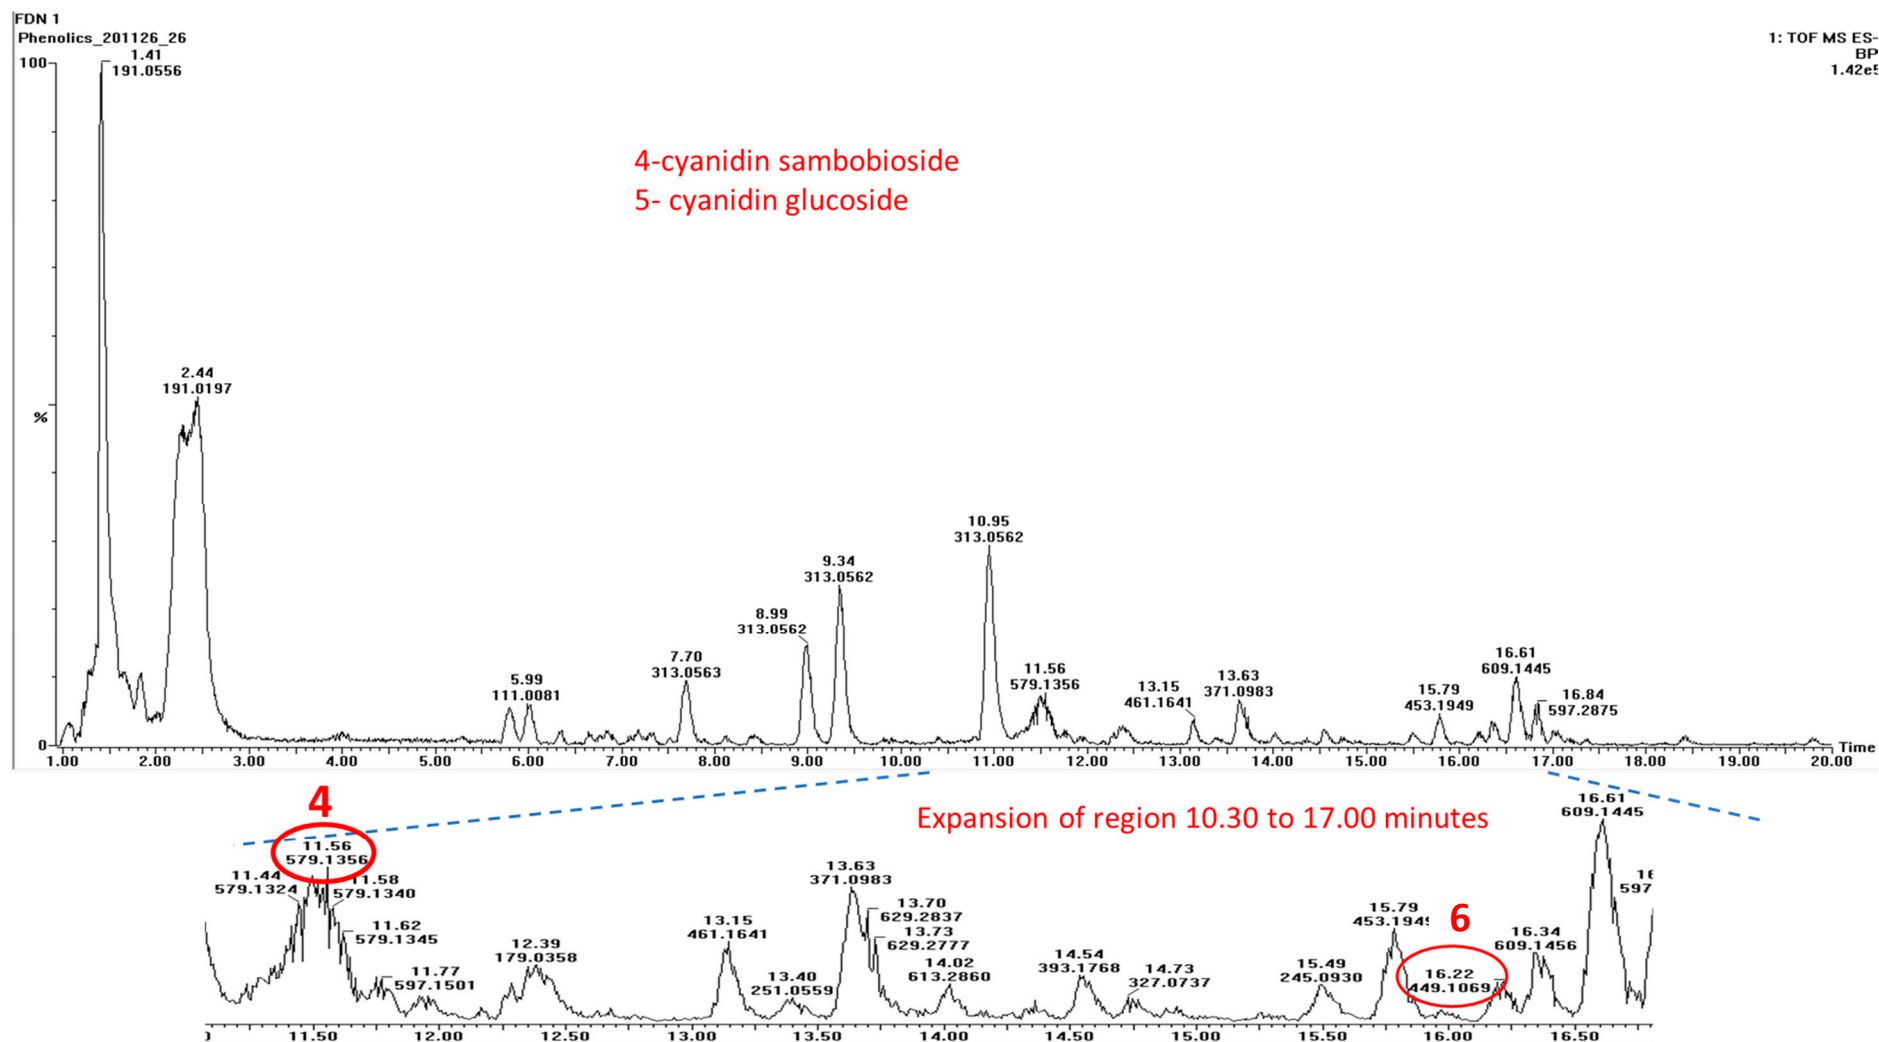

Figure S1 A & B. showing the ESI negative mode BPI chromatogram of the full chromatogram of the hydromethanol extract of Natal plum fruits overlaid with an expansion of the region 10.30 min to 17.00 min of the chromatogram which shows the anthocyanins cyanidin 3-O- $\beta$ -sambubioside and cyanidin-3-O-

glucoside. Where Figure S1 (A) no 4 shows the  $m/z$  579.1356 retention time 11.56 min as cyanidin 3-sambubioside (Cy-3-Sa) and in Figure S1 (B) no 6 at  $m/z$  449.1069 retention time 16.22 min was tentatively identified as cyanidin-3-O-glucoside

DS\_TUT\_Anthocyan\_201123\_6 1730 (13.477) Cm (1730:1740-(1780:1801+1665:1682))

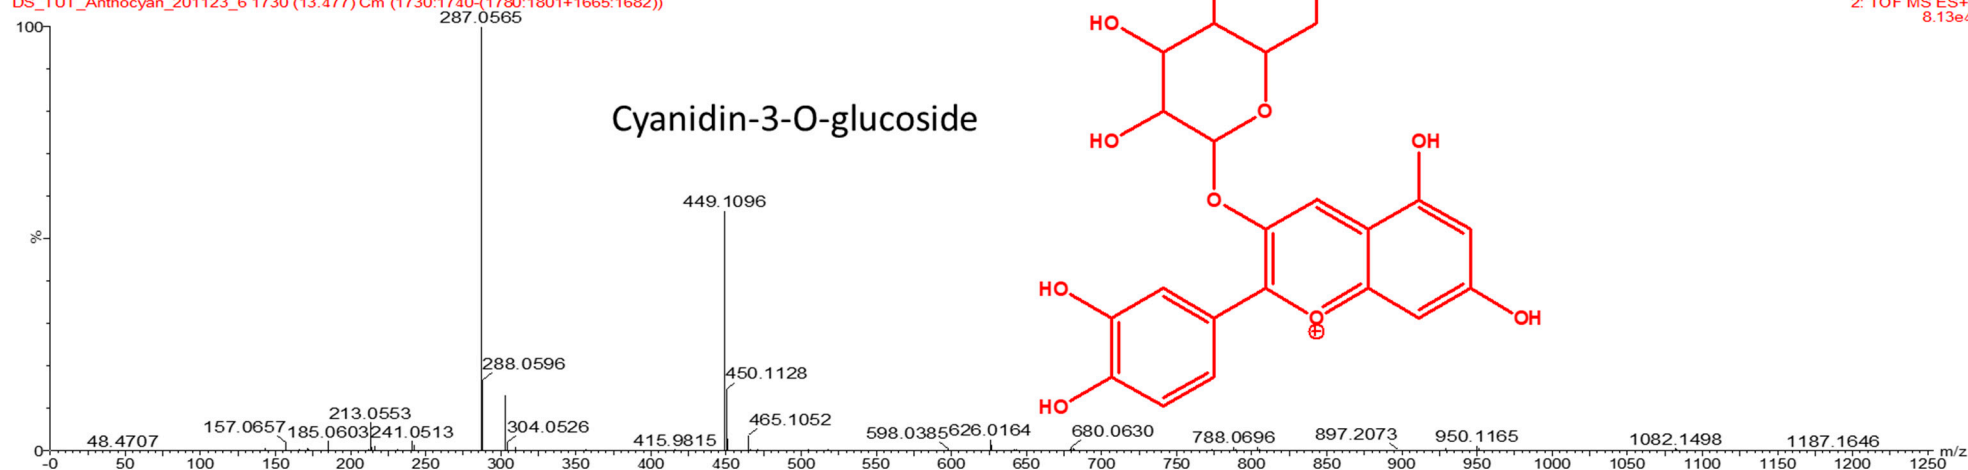

DS\_TUT\_Anthocyan\_201123\_6 1693 (13.180) Cm (1686:1693-(1651:1664+1739:1760))

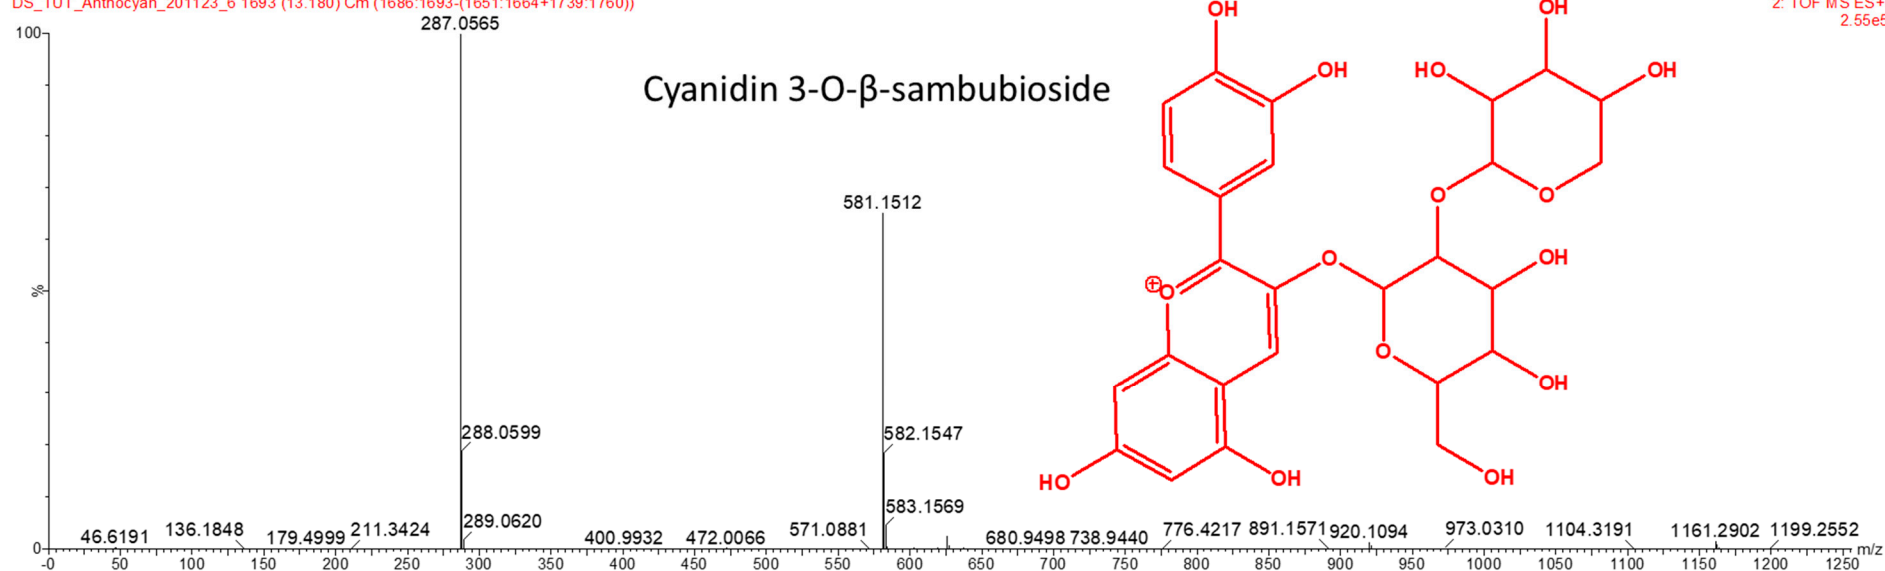

Figure S2A & B shows the MS/MS fragmentation of the identified cyanidin compounds. The Figure S2A shows the Cyanidin-3-O glucoside structure and

MS/MS fragmentation positive mode) overlaid and Figure S 2B shows the Cyanidin 3-O- $\beta$ -sambubioside and its MS/MS fragmentation pattern in the positive mode

Table S1 Phenolic identification and quantification using HPLC-DAD

| Phenolic            | Retention time (min) | Regression equation | R <sup>2</sup> | LOD ( $\mu\text{g/L}$ ) | LOQ ( $\mu\text{g/L}$ ) |
|---------------------|----------------------|---------------------|----------------|-------------------------|-------------------------|
| Gallic              | 7.897                | y =99324x+55626     | 0.998          | 0.05                    | 0.19                    |
| Protocatechuic acid | 11.255               | y=19722x-341718     | 0.998          | 3.2                     | 10.9                    |
| Catechin            | 13.24                | y=2828x-69172       | 0.999          | 3.2                     | 15.7                    |
| Epicatechin         | 14.2                 | y=35316x+193517     | 0.997          | 1.4                     | 3.3                     |
| Caffeic             | 14.509               | y=28189x-161653     | 0.999          | 2.2                     | 7.2                     |
| Chlorogenic         | 14.724               | y=71930x-2110,5     | 0.995          | 0.11                    | 0.37                    |
| Quercetin           | 16.77                | y=12091x-170181     | 0.996          | 7.7                     | 25.8                    |
| Ferulic             | 17. 93               | y=20067x-279209     | 0.999          | 3.3                     | 11.9                    |
| p-Coumaric          | 17.54                | y=6925.3x-62646     | 0.999          | 10.25                   | 34.17                   |
| Kaempferol          | 16.448               | y=26658x+492185     | 0.996          | 2.7                     | 9.3                     |
| Syringic            | 15.44                | y=75813x-107617     | 0.999          | 0.05                    | 0.18                    |
| Ellagic             | 15. 996              | y=20110x+9484.9     | 0.997          | 0.31                    | 1.2                     |
| Luteolin            | 24.62                | y=27483x+409713     | 0.998          | 2.3                     | 7.7                     |

Limit of detection (LOD) and Limit of quantification (LOQ)

Table S2. Tentative peak identification of the compounds detected in the hydromethanol extract of undigested, gastric and intestinal digested Natal plum freeze dried powder

| Compound | Retention time (min) | formula | [M-H] <sup>-</sup> | Error ppm | MSE fragments | Tentative Identification |
|----------|----------------------|---------|--------------------|-----------|---------------|--------------------------|
|----------|----------------------|---------|--------------------|-----------|---------------|--------------------------|

|   |       |                                                               |          |        |                                              |                                              |
|---|-------|---------------------------------------------------------------|----------|--------|----------------------------------------------|----------------------------------------------|
| 1 | 5.56  | C <sub>9</sub> H <sub>17</sub> NO <sub>9</sub>                | 282.0834 | -1.42  | 211.0031<br>150.0408<br>108.0219             | Amino acid<br>derivative                     |
| 2 | 8.45  | C <sub>11</sub> H <sub>12</sub> N <sub>2</sub> O <sub>2</sub> | 203.0819 | 3.45   | 74.0078<br>116.0517<br>129.0421<br>159.0858  | Tryptophan                                   |
| 3 | 11.48 | C <sub>21</sub> H <sub>20</sub> O <sub>11</sub>               | 447.0958 | -5.59  | 285.0359<br>299.0684                         | Quercitrin                                   |
| 4 | 11.63 | C <sub>26</sub> H <sub>29</sub> O <sub>15</sub>               | 579.1287 | 11.7   | 125.0371<br>149.0234<br>147.0614<br>285.0411 | Cyanidin<br>sambubioside                     |
|   |       |                                                               |          |        | 447.0934                                     |                                              |
| 5 | 15.51 | C <sub>17</sub> H <sub>12</sub> NO                            | 245.0931 | -34.7  | 116.0415<br>129.0372<br>159.0672<br>203.0790 | Amino acid<br>derivative                     |
| 6 | 16.22 | C <sub>21</sub> H <sub>22</sub> O <sub>11</sub>               | 449.1083 | 1.34   | 285.0040<br>447.0977                         | Cyanidin<br>glucoside                        |
| 7 | 16.36 | C <sub>27</sub> H <sub>30</sub> O <sub>16</sub>               | 609.1399 | 10.18  | 300.0276                                     | Quercetin-3-<br>galactoside 7-<br>rhamnoside |
| 8 | 16.60 | C <sub>27</sub> H <sub>30</sub> O <sub>16</sub>               | 609.1445 | 2.62   | 179.0415<br>300.0302<br>463.0930             | Rutin                                        |
| 9 | 17.00 | C <sub>21</sub> H <sub>20</sub> O <sub>12</sub>               | 463.0977 | -20.51 | 301.0298<br>153.0900                         | Quercetin-3-<br>galactoside                  |

Table S3 Pearson's correlation coefficient of different phenolic components antioxidant and  $\alpha$ -glucosidase activities

| Phenolics                           | r<br>DPPH<br>inhibition<br>IC <sub>50</sub> | r<br>ABTS<br>inhibition<br>IC <sub>50</sub> | r<br>FRAP | r<br>$\alpha$ -glucosidase<br>inhibition IC <sub>50</sub> |
|-------------------------------------|---------------------------------------------|---------------------------------------------|-----------|-----------------------------------------------------------|
| Eellagic acid                       | 0.55                                        | 0.48                                        | 0.25      | 0.56                                                      |
| Gallic acid                         | 0.68                                        | 0.74                                        | 0.64      | 0.66                                                      |
| Protocatechuic acid                 | 0.68                                        | 0.59                                        | 0.59      | 0.701                                                     |
| p-Coumaric acid                     | 0.69                                        | 0.72                                        | 0.83      | 0.68                                                      |
| Ferulic acid                        | 0.64                                        | 0.50                                        | 0.45      | 0.67                                                      |
| Caffeic acid                        | 0.79                                        | 0.65                                        | 0.55      | 0.81                                                      |
| Catechin                            | 0.98                                        | 0.93                                        | 0.85      | 0.98                                                      |
| Epicatechin                         | 0.97                                        | 0.94                                        | 0.89      | 0.98                                                      |
| Kaempferol                          | 0.49                                        | 0.49                                        | 0.63      | 0.48                                                      |
| Quercitin                           | 0.69                                        | 0.54                                        | 0.48      | 0.71                                                      |
| naringenin                          | 0.66                                        | 0.52                                        | 0.478     | 0.70                                                      |
| Apigenin                            | 0.46                                        | 0.28                                        | 0.27      | 0.50                                                      |
| Luteolin                            | 0.69                                        | 0.55                                        | 0.48      | 0.71                                                      |
| Cyanidin 3-O-sambubioside           | 0.99                                        | 0.95                                        | 0.87      | 0.98                                                      |
| Cyanidin 3-O-glucoside              | 0.92                                        | 0.87                                        | 0.85      | 0.93                                                      |
| Quercitrin                          | 0.76                                        | 0.626                                       | 0.614     | 0.79                                                      |
| Quercetin 3 galactoside 7 rhamoside | 0.40                                        | 0.21                                        | 0.20      | 0.436234                                                  |
| Quercetin 3 galactoside             | 0.98                                        | 0.09                                        | 0.256905  | 0.327719                                                  |
| Quercetin-3-O-rutinoside (Rutin)    | 0.28                                        | 0.98                                        | 0.992623  | 0.93086                                                   |

Pearson's correlation coefficient =  $r$
